# Supplementary material for: Forecasting Human African Trypanosomiasis Prevalences from Population Screening Data Using Continuous Time Models
Source: PubMed Central journal article supplement (PMC5033383; doi:10.1371/journal.pcbi.1005103), 2016-09-22
Supplement: pcbi.1005103.s002.pdf [file pcbi.1005103.s002.pdf]

## S2 Text

**Proofs on Screening Requirements for Eradication.** For sake of conciseness we omit the subscript  $v$  in this section. Before we state our proofs, let us make some observations about the expected prevalence level immediately after the  $n^{\text{th}}$  screening round:

$$f(S_n^+) = \frac{K}{1 + A_n} \tag{1}$$

Let us specifically focus on the parameter  $A_n$ . Note that a larger value of  $A_n$  implies a lower prevalence level after the screening round and vice versa. Recall that the impact of a screening round is estimated as (see main text):

$$f_v(S_{vn}^+) = (1 - p_{vn} \cdot s) f_v(S_{vn}^-),$$

This implies for any  $n \geq 1$ :

$$A_n = \frac{K}{f(S_n^+)} - 1 \tag{2}$$

$$= \frac{K}{(1 - p \cdot s) \cdot f(S_n^-)} - 1 \tag{3}$$

$$= \frac{K}{(1 - p \cdot s) \cdot \frac{K}{1 + A_{n-1} \cdot e^{-\kappa \cdot \tau}}} - 1 \tag{4}$$

$$= \alpha \cdot A_{n-1} + \beta \tag{5}$$

$$= \alpha^n \cdot A_0 + \sum_{i=1}^n \alpha^{n-i} \cdot \beta \tag{6}$$

$$= \begin{cases} \alpha^n \cdot A_0 + \beta \frac{\alpha^n - 1}{\alpha - 1} & \text{if } \alpha \neq 1 \\ A_0 + n \cdot \beta & \text{if } \alpha = 1 \end{cases} \tag{7}$$

Here,  $\alpha = \frac{1}{1-p \cdot s} e^{-\kappa \cdot \tau}$ ,  $\beta = \frac{p \cdot s}{1-p \cdot s}$ , and  $A_0 = \frac{K}{f(0)} - 1$ . Note that  $\alpha$ ,  $\beta$ , and  $A_0$  are strictly positive. These observations and definitions allow us to prove the following results.

**Lemma 1.** *If  $\tau \leq \frac{-\log(1-p \cdot s)}{\kappa}$ , then  $\lim_{n \rightarrow \infty} A_n = \infty$  and  $A_n$  is discretely convex and increasing in  $n$ .*

*Proof.* First, rewriting yields that the condition  $\tau \leq \frac{-\log(1-p \cdot s)}{\kappa}$  is equivalent to the condition  $\alpha = \frac{1}{1-p \cdot s} e^{-\kappa \cdot \tau} \geq 1$ . The result now follows immediately from Eq. (7) and by the observations that  $A_0 > 0$  and  $\beta > 0$ . If  $\alpha > 1$  these imply that:

$$\lim_{n \rightarrow \infty} A_n > \lim_{n \rightarrow \infty} \alpha^n A_0 = \infty \tag{8}$$

Furthermore, if  $\alpha = 1$ , it holds that:

$$\lim_{n \rightarrow \infty} A_n = \lim_{n \rightarrow \infty} A_0 + n \cdot \beta = \infty \tag{9}$$

The discrete convexity of  $A_n$  is trivial for the case that  $\alpha = 1$ , since  $A_n$  is linear in  $n$  in this case. If  $\alpha > 1$ , the convexity follows from the fact that every function having the form  $c \cdot \alpha^n + d$  is convex in  $n$  for  $c \geq 0$  and  $\alpha \geq 0$ . Finally, the fact that  $A_n$  is increasing in  $n$  follows directly from Eq (6). □

**Lemma 2.** If  $\tau > \frac{-\log(1-p \cdot s)}{\kappa}$ , then the sequence  $\{A_n\}$  converges monotonically to  $A = \frac{\beta}{1-\alpha}$ .

*Proof.* First, rewriting yields that the condition  $\tau > \frac{-\log(1-p \cdot s)}{\kappa}$  is equivalent to the condition  $\alpha = \frac{1}{1-p \cdot s} e^{-\kappa \cdot \tau} < 1$ . The fact that the sequence converges to  $A$  now follows immediately by taking the limit in Eq. (7):

$$\lim_{n \rightarrow \infty} A_n = \lim_{n \rightarrow \infty} \alpha^n \cdot A_0 + \beta \frac{\alpha^n - 1}{\alpha - 1} \tag{10}$$

$$= \frac{\beta}{1 - \alpha} = A \tag{11}$$

To prove that  $A_n$  converges *monotonically* to  $A$ , we distinguish two cases:  $A_{n-1} < A$  and  $A_{n-1} > A$ , (it is obvious for  $A_{n-1} = A$ ). First, consider the case that  $A_{n-1} < A$ . We show that  $A_n < A$ , and that  $A_n - A_{n-1} > 0$ , implying monotonicity. The first claim is implied by Eq. (6):

$$A_n = \alpha \cdot A_{n-1} + \beta \tag{12}$$

$$< \alpha \cdot \frac{\beta}{1 - \alpha} + \beta \tag{13}$$

$$= \frac{\beta}{1 - \alpha} = A \tag{14}$$

To prove the second claim we make use of the given that  $\alpha < 1$ :

$$A_n - A_{n-1} = \alpha \cdot A_{n-1} + \beta - A_{n-1} \tag{15}$$

$$= (\alpha - 1) A_{n-1} + \beta \tag{16}$$

$$> (\alpha - 1) \frac{\beta}{1 - \alpha} + \beta = 0 \tag{17}$$

Next, consider the case that  $A_{n-1} > A$ . Using on exactly the same reasoning as the one presented above, it follows that  $A_n > A$  as well, and that  $A_n - A_{n-1} < 0$ .

This completes the proof. □

Now we have established the (long term) behavior of the parameter  $A_n$ , let us consider the implications for the (long term) prevalence level. Recall that  $\bar{f}_{n,n+1}$  denotes the expected average prevalence level faced between screening rounds  $n$  and  $n + 1$ , which is calculated as:

$$\bar{f}_{n,n+1} = \frac{1}{\tau} \int_0^\tau \frac{K}{1 + A_n \cdot e^{-\kappa \cdot t}} dt \tag{18}$$

$$= \frac{K}{\kappa \cdot \tau} \log \left( \frac{A_n + e^{\kappa \cdot \tau}}{A_n + 1} \right) \tag{19}$$

Using this definition, we now prove the desired results:

**Proposition 1.** If  $\tau \leq \frac{-\log(1-p \cdot s)}{\kappa}$ , then  $\lim_{n \rightarrow \infty} \bar{f}_{n,n+1} = 0$ .

*Proof.* From Lemma 1 we know that  $\lim_{n \rightarrow \infty} A_n = \infty$ . Hence, we derive that:

$$\lim_{n \rightarrow \infty} \bar{f}_{n,n+1} = \lim_{n \rightarrow \infty} \frac{K}{\kappa \cdot \tau} \log \left( \frac{A_n + e^{\kappa \cdot \tau}}{A_n + 1} \right) \quad (20)$$

$$= \frac{K}{\kappa \cdot \tau} \log(1) = 0 \quad (21)$$

□

**Proposition 2.** If  $\tau > \frac{-\log(1-p \cdot s)}{\kappa}$ , then  $\lim_{n \rightarrow \infty} \bar{f}_{n,n+1} = K \left( \frac{\log(1-p \cdot s)}{\kappa \cdot \tau} + 1 \right)$ .

*Proof.* From Lemma 2 we know that  $\lim_{n \rightarrow \infty} A_n = A = \frac{\beta}{1-\alpha}$ . Hence, we derive that:

$$\lim_{n \rightarrow \infty} \bar{f}_{n,n+1} = \lim_{n \rightarrow \infty} \frac{K}{\kappa \cdot \tau} \log \left( \frac{A_n + e^{\kappa \cdot \tau}}{A_n + 1} \right) \quad (22)$$

$$= \frac{K}{\kappa \cdot \tau} \log((1-p \cdot s) e^{\kappa \cdot \tau}) \quad (23)$$

$$= K \left( \frac{\log(1-p \cdot s)}{\kappa \cdot \tau} + 1 \right) \quad (24)$$

□
