# Supplementary material for: Forecasting Human African Trypanosomiasis Prevalences from Population Screening Data Using Continuous Time Models
Source: PubMed Central journal article supplement (PMC5033383; doi:10.1371/journal.pcbi.1005103), 2016-09-22
Supplement: pcbi.1005103.s003.pdf [file pcbi.1005103.s003.pdf]

### S3 Text

**Proofs on Screening Requirements for Elimination.** For sake of conciseness, we omit the subscript  $v$  in this section. Recall that  $\alpha = \frac{1}{1-p \cdot s} e^{-\kappa \cdot \tau}$ ,  $\beta = \frac{p \cdot s}{1-p \cdot s}$ , that  $A_0 = \frac{K}{f(0)} - 1$ , and that  $\alpha$ ,  $\beta$ , and  $A_0$  are strictly positive.

**Proposition 3.** *If  $f(0) > C$  and  $\tau \leq \frac{-\log(1-p \cdot s)}{\kappa}$ , the expected prevalence level is smaller than or equal to  $C$  after screening round  $n^*$ , where*

$$n^* = \begin{cases} \left\lceil \alpha \log \left( \frac{\frac{K}{C} - 1 + \frac{\beta}{\alpha - 1}}{A_0 + \frac{\beta}{\alpha - 1}} \right) \right\rceil & \text{if } \alpha > 1 \\ \left\lceil \frac{\frac{K}{C} - 1 - A_0}{\beta} \right\rceil & \text{if } \alpha = 1 \end{cases} \quad (1)$$

*Proof.* First, rewriting yields that the condition  $\tau \leq \frac{-\log(1-p \cdot s)}{\kappa}$  is equivalent to the condition  $\alpha = \frac{1}{1-p \cdot s} e^{-\kappa \cdot \tau} \geq 1$ . According to the LMCCC model, the first time the expected prevalence level crosses the boundary value  $C$  occurs immediately after a screening round. This is because the expected prevalence level only increases in the period between two screening rounds. Hence, we prove our theorem by determining the screening round  $n^* : f(S_{n^*}^+) \leq C$ . By the definition of  $A_n = \frac{K}{f(S_n^+)} - 1$ , we know that this is equivalent to determining  $n^* : A_{n^*} \geq \frac{K}{C} - 1$ . Now, substituting the following recurrence relation (see S2 Text)

$$A_n = \begin{cases} \alpha^n \cdot A_0 + \beta \frac{\alpha^n - 1}{\alpha - 1} & \text{if } \alpha > 1 \\ A_0 + n \cdot \beta & \text{if } \alpha = 1 \end{cases} \quad (2)$$

yields:

$$\alpha^n \cdot A_0 + \beta \frac{\alpha^n - 1}{\alpha - 1} \geq \frac{K}{C} - 1 \quad \text{if } \alpha > 1 \quad (3)$$

$$A_0 + n \cdot \beta \geq \frac{K}{C} - 1 \quad \text{if } \alpha = 1 \quad (4)$$

Rewriting these inequalities gives the desired result. □

**Lemma 1.** *Given that  $\tau = \frac{T}{n} \leq \frac{-\log(1-p \cdot s)}{\kappa}$ , then  $\lim_{n \rightarrow \infty} A_n = \infty$  and the sequence  $\{A_n\}$  is monotonically increasing in  $n$ .*

*Proof.* To reflect that the value of  $\alpha$  now depends on  $n$ , the number of screening rounds performed in the next  $T$  years, let us define  $\alpha_n$  as:

$$\alpha_n = \frac{1}{1-p \cdot s} \cdot e^{-\kappa \frac{T}{n}} \quad (5)$$

Hence, rewriting the definition of  $A_n$  in terms of  $\alpha_n$  yields:

$$A_n = \alpha_n^n \cdot A_0 + \sum_{i=1}^n \alpha_n^{n-i} \cdot \beta \quad (6)$$

In what follows, we make use of the fact that  $\alpha_n \geq 1$ , that  $\alpha_n > \alpha_{n-1} > 0$  and hence that  $\alpha_n^i > \alpha_{n-1}^i$ . This property follows directly from the definition of  $\alpha_n$  and from the

fact that  $\kappa \cdot T$  is strictly positive. Using this result, the first part of the Lemma is shown by taking the limit for  $n$ :

$$\lim_{n \rightarrow \infty} A_n = \lim_{n \rightarrow \infty} \alpha_n^n \cdot A_0 + \sum_{i=1}^n \alpha_n^{n-i} \cdot \beta = \infty \quad (7)$$

The following inequality proves that  $A_n - A_{n-1} > 0$ , and hence that  $A_n$  increases monotonically with  $n$ :

$$A_n - A_{n-1} = A_0 (\alpha_n^n - \alpha_{n-1}^{n-1}) + \beta \left( \alpha_n^n + \sum_{i=1}^{n-2} (\alpha_n^i - \alpha_{n-1}^i) \right) > 0 \quad (8)$$

□
