# Supplementary material for: Forecasting Human African Trypanosomiasis Prevalences from Population Screening Data Using Continuous Time Models
Source: PubMed Central journal article supplement (PMC5033383; doi:10.1371/journal.pcbi.1005103), 2016-09-22
Supplement: pcbi.1005103.s004.pdf [file pcbi.1005103.s004.pdf]

S1 Table

Table of Notations.

Table 1. Table of Notations.

| <i>Village characteristics</i>             |                                                                                                                  |
|--------------------------------------------|------------------------------------------------------------------------------------------------------------------|
| $V$                                        | set of villages $v$                                                                                              |
| $N_v$                                      | population size of village $v$                                                                                   |
| $p_{vn}$                                   | participation fraction in the $n^{th}$ screening round for village $v$                                           |
| $S_{vn}$                                   | time at which the $n^{th}$ screening round in village $v$ is performed                                           |
| $S_{vn}^+$                                 | moment immediately after the $n^{th}$ screening round in village $v$                                             |
| $S_{vn}^-$                                 | moment just before the $n^{th}$ screening round in village $v$                                                   |
| $s_{vn}$                                   | time between the $n - 1^{th}$ and the $n^{th}$ screening round in village $v$                                    |
| $\delta_v^-(t)$                            | time since the last screening round in village $v$ before time $t$                                               |
| $\tilde{\mu}_v$                            | average screening frequency in village $v$ during 5 consecutive years                                            |
| $\bar{\mu}_v(S_{vn})$                      | average screening frequency in the 3 years prior to the $n^{th}$ screening round in village $v$                  |
| <i>Prevalence level notations</i>          |                                                                                                                  |
| $x_v(t)$                                   | prevalence level (fraction) in village $v$ observed at time $t$                                                  |
| $f_v(t)$                                   | expected prevalence level (fraction) in village $v$ at time $t$                                                  |
| $\varepsilon_v$                            | random disturbance for the prevalence level (fraction) in village $v$                                            |
| $\tilde{x}_v$                              | average observed prevalence level (fraction) in village $v$ during 5 consecutive years                           |
| $\bar{x}_v(S_{vn})$                        | average observed prevalence level (fraction) in the 3 years prior to the $n^{th}$ screening round in village $v$ |
| <i>Prediction model notations</i>          |                                                                                                                  |
| $\alpha_v$                                 | fixed effect for village $v$                                                                                     |
| $K_v$                                      | carrying capacity of village $v$                                                                                 |
| $\kappa$                                   | growth rate parameter                                                                                            |
| $A_{vn}$                                   | initial value parameter for screening round $n$ in village $v$                                                   |
| $e_{vn}$                                   | prediction error/ fitting deviation for screening round $n$ in village $v$                                       |
| $w_{vn}$                                   | weight of observation $n$ for village $v$                                                                        |
| <i>Disease characteristics</i>             |                                                                                                                  |
| $r$                                        | yearly removal rate for HAT                                                                                      |
| $R_0$                                      | basic reproduction number for HAT                                                                                |
| $s$                                        | sensitivity of the diagnostic test                                                                               |
| <i>Screening policy analysis notations</i> |                                                                                                                  |
| $\tau$                                     | fixed time interval for screening rounds                                                                         |
| $\bar{f}_{n,n+1}$                          | expected average prevalence level between the $n^{th}$ and the $(n + 1)^{th}$ screening round                    |
