# Supplementary material for: Forecasting Human African Trypanosomiasis Prevalences from Population Screening Data Using Continuous Time Models
Source: PubMed Central journal article supplement (PMC5033383; doi:10.1371/journal.pcbi.1005103), 2016-09-22
Supplement: pcbi.1005103.s005.pdf [file pcbi.1005103.s005.pdf]

S2 Table

Results for Maximum Likelihood Approaches.

**Table 1. Predictive performance of the five models in terms of mean errors (*ME*), mean absolute errors (*MAE*), and mean relative errors (*MRE*) when they are fitted using a maximum likelihood approach assuming a Poisson, Beta-Binomial, or Negative Binomial distribution.**

|                 | Poisson   |            |            | Beta-Binomial |            |            | Negative Binomial |            |            |
|-----------------|-----------|------------|------------|---------------|------------|------------|-------------------|------------|------------|
|                 | <i>ME</i> | <i>MAE</i> | <i>MRE</i> | <i>ME</i>     | <i>MAE</i> | <i>MRE</i> | <i>ME</i>         | <i>MAE</i> | <i>MRE</i> |
| Model 1: LM     | *         | *          | *          | *             | *          | *          | *                 | *          | *          |
| Model 2: FEM    | -0.00080  | 0.00598    | 1.88       | 0.00168       | 0.00702    | 2.21       | -0.000232         | 0.00523    | 1.65       |
| Model 3: LMCCC  | 0.00132   | 0.00667    | 2.10       | 0.01056       | 0.01537    | 4.84       | 0.00689           | 0.01187    | 3.74       |
| Model 4: rLMCCC | 0.00575   | 0.01080    | 3.39       | 0.03352       | 0.03802    | 11.97      | 0.02248           | 0.02708    | 8.52       |
| Model 5: LMVCC  | -0.00007  | 0.00434    | 1.36       | 0.00639       | 0.00943    | 2.97       | 0.00194           | 0.00720    | 2.27       |

\* Model could not be fitted: several observations require the calculation of  $P(x_v(t) = y), y > 0$ , whereas  $f_v(t) = 0$ . Since this probability equals 0 irrespective of the parameter estimates, the (log)likelihood could not be maximized.
