# Supplementary material for: Forecasting Human African Trypanosomiasis Prevalences from Population Screening Data Using Continuous Time Models
Source: PubMed Central journal article supplement (PMC5033383; doi:10.1371/journal.pcbi.1005103), 2016-09-22
Supplement: pcbi.1005103.s006.pdf [file pcbi.1005103.s006.pdf]

S3 Table

Sensitivity Analysis on the Sensitivity Level and Participation Level.

**Table 1. Predictive performance of the logistic models in terms of mean errors (*ME*), mean absolute errors (*MAE*), and mean relative errors (*MRE*) when the real case detection fraction ( $s \cdot p_{vn}$ ) deviates a fraction  $\rho$  from the values used in the baseline analysis. E.g.,  $\rho = -0.1$  means that the real fraction is 10% smaller than the presently used fraction. The best indicator values are in bold.**

|                 | $\rho = -0.2$   |                |             | $\rho = -0.1$   |                |             | $\rho = 0.05$  |                |             |
|-----------------|-----------------|----------------|-------------|-----------------|----------------|-------------|----------------|----------------|-------------|
|                 | <i>ME</i>       | <i>MAE</i>     | <i>MRE</i>  | <i>ME</i>       | <i>MAE</i>     | <i>MRE</i>  | <i>ME</i>      | <i>MAE</i>     | <i>MRE</i>  |
| Model 3: LMCCC  | <b>-0.00018</b> | 0.00530        | 1.67        | <b>-0.00033</b> | 0.00521        | 1.64        | -0.00112       | 0.00463        | 1.46        |
| Model 4: rLMCCC | 0.00221         | 0.00728        | 2.29        | 0.00150         | 0.00674        | 2.12        | <b>0.00014</b> | 0.00577        | 1.82        |
| Model 5: LMVCC  | -0.00113        | <b>0.00395</b> | <b>1.24</b> | -0.00136        | <b>0.00382</b> | <b>1.20</b> | -0.00191       | <b>0.00357</b> | <b>1.13</b> |
