# Supplementary material for: Forecasting Human African Trypanosomiasis Prevalences from Population Screening Data Using Continuous Time Models
Source: PubMed Central journal article supplement (PMC5033383; doi:10.1371/journal.pcbi.1005103), 2016-09-22
Supplement: pcbi.1005103.s007.pdf [file pcbi.1005103.s007.pdf]

S4 Table

Sensitivity Analysis on the Initial Value Assumption.

Table 1. Predictive performance of the logistic models in terms of mean errors (*ME*), mean absolute errors (*MAE*), and mean relative errors (*MRE*) for different assumptions about  $\iota$ , the parameter determining the expected prevalence level at the beginning of the time horizon:  $f_v(0) = \iota \tilde{x}_v$ .

|                 | $\iota = 0.4$  |                |             | $\iota = 0.6$  |                |             | $\iota = 0.8$  |                |             |
|-----------------|----------------|----------------|-------------|----------------|----------------|-------------|----------------|----------------|-------------|
|                 | <i>ME</i>      | <i>MAE</i>     | <i>MRE</i>  | <i>ME</i>      | <i>MAE</i>     | <i>MRE</i>  | <i>ME</i>      | <i>MAE</i>     | <i>MRE</i>  |
| Model 3: LMCCC  | -0.00086       | 0.00481        | 1.51        | -0.00095       | 0.00475        | 1.50        | -0.00096       | 0.00475        | 1.49        |
| Model 4: rLMCCC | <b>0.00069</b> | 0.00619        | 1.95        | <b>0.00028</b> | 0.00583        | 1.84        | <b>0.00009</b> | 0.00567        | 1.79        |
| Model 5: LMVCC  | -0.00171       | <b>0.00395</b> | <b>1.16</b> | -0.00186       | <b>0.00369</b> | <b>1.12</b> | -0.00194       | <b>0.00350</b> | <b>1.10</b> |
