# Supplementary material for: Forecasting Human African Trypanosomiasis Prevalences from Population Screening Data Using Continuous Time Models
Source: PubMed Central journal article supplement (PMC5033383; doi:10.1371/journal.pcbi.1005103), 2016-09-22
Supplement: pcbi.1005103.s008.pdf [file pcbi.1005103.s008.pdf]

S1 Figure

Prediction Errors.

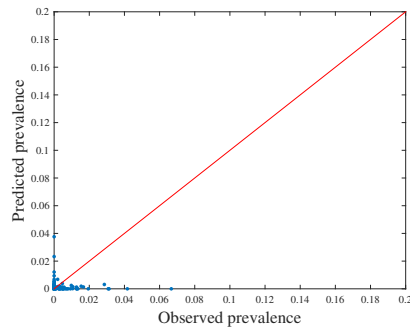

(A) LM model

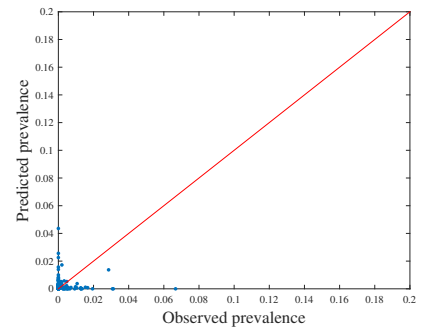

(B) FE model

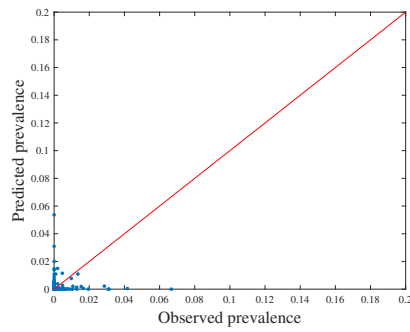

(C) LMCCC model

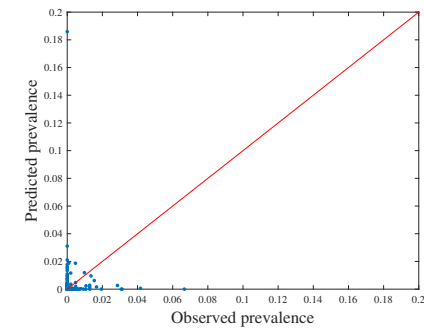

(D) rLMCCC model

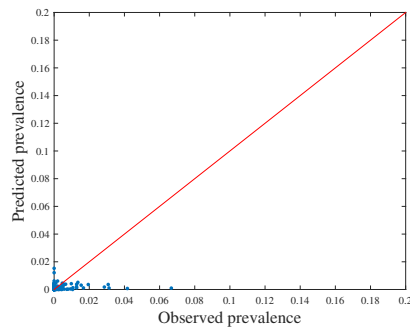

(E) LMVCC model

**Predicted prevalence vs. observed prevalence for the 143 observations in the prediction sample.**
